# Supplementary material for: Titanium Dioxide Nanoparticles (TiO2) Quenching Based Aptasensing Platform: Application to Ochratoxin A Detection
Source: Toxins (Basel). 2015 Sep 22;7(9):3771–84. doi: 10.3390/toxins7093771 (PMC4591649; doi:10.3390/toxins7093771)
Supplement: Supplementary file 1 [file toxins-07-03771-s001.pdf]

## Supplementary Information

**Table S1.** UV-Vis absorption characterization of TiO<sub>2</sub>-aptamer complex at  $\lambda_{\text{max}}$  of 255 nm in HBB (pH 7.4).

| S. No | Description                  | Absorbance |
|-------|------------------------------|------------|
| 1.    | Aptamer                      | 0.139      |
| 2.    | Aptamer-OTA                  | 0.186      |
| 3.    | Aptamer-OTA-TiO <sub>2</sub> | 0.195      |
| 4.    | Aptamer-TiO <sub>2</sub>     | 0.312      |

Selectivity of proposed TiO<sub>2</sub> based platform for OTA detection. The selectivity of proposed assay for OTA was also evaluated using three different concentration of Ochratoxin B (OTB). As can be clearly seen in Table S2, the obtained fluorescence response of OTB were accurate and less than 10% in comparison to OTA. Obtained results were attributed to the high selectivity of aptamer used for analysis of OTA.

**Table S2.** Specificity performance of TNPs assay for OTA detection.

| Concentration<br>( $\mu\text{M}$ ) | OTA Recovered FL Intensity (%) |          | OTB Recovered FL Intensity (%) |          | % Response of OTB<br>( $F_{\text{OTB}}/F_{\text{OTA}} \times 100$ ) |
|------------------------------------|--------------------------------|----------|--------------------------------|----------|---------------------------------------------------------------------|
|                                    | Mean $\pm$ S.D. ( $n = 3$ )    | % R.S.D. | Mean $\pm$ S.D. ( $n = 3$ )    | % R.S.D. |                                                                     |
| 0.0031                             | 7.11 $\pm$ 0.269               | 3.78     | 0.014 $\pm$ 0.0005             | 3.57     | 0.197                                                               |
| 0.25                               | 41.07 $\pm$ 2.199              | 5.35     | 0.961 $\pm$ 0.0515             | 5.36     | 2.339                                                               |
| 10                                 | 92.22 $\pm$ 2.137              | 2.32     | 8.871 $\pm$ 0.2055             | 2.32     | 9.619                                                               |

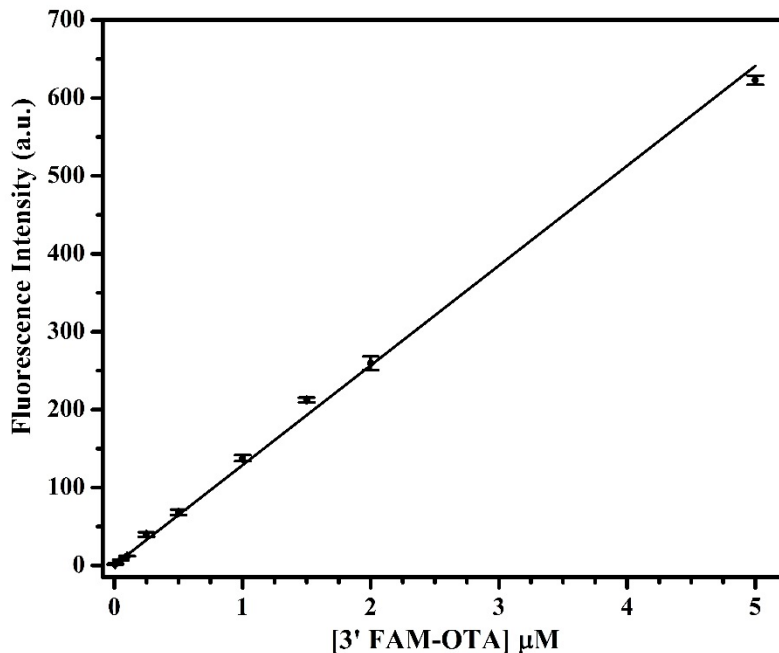

**Figure S1.** Optimization of FAM-labeled anti-OTA aptamer. The error bars were obtained from their parallel measurements.

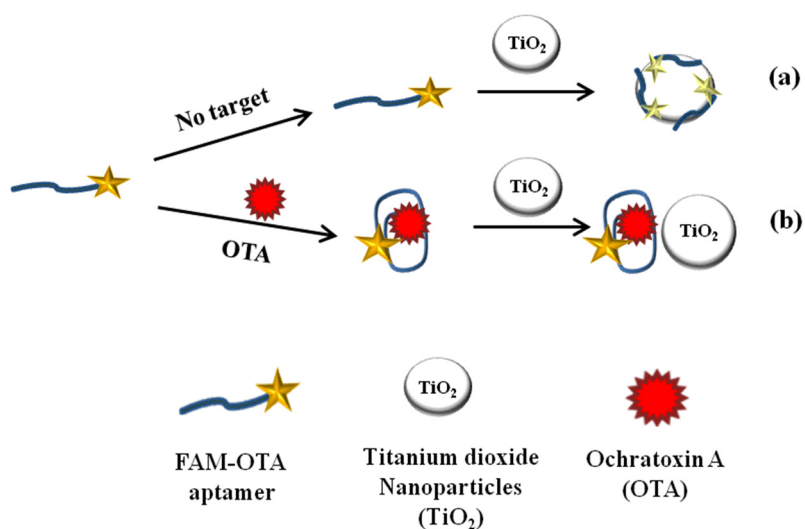

**Figure S2.** Schematic representation of TiO<sub>2</sub> quenching based aptamer assay for ochratoxin A (OTA). **(a)** Adsorption of FAM-labeled anti-OTA aptamer on TiO<sub>2</sub> surface causes fluorescence quenching; **(b)** In presence of OTA, the formation of anti-parallel G-quadruplex structure formation resist further adsorption and the fluorescence is recovered.
